# Supplementary material for: Base-free selective oxidation of pectin derived galacturonic acid to galactaric acid using supported gold catalysts
Source: Royal Society of Chemistry journal article supplement (doi:10.1039/c8gc00103k), 2018-01-01
Supplement: c8gc00103k1.pdf [file c8gc00103k1.pdf]

## Base free selective oxidation of pectin derived galacturonic acid to galactaric acid using gold catalysts

R. K. Pazhavelikkakath Purushothaman, F. van der Klis, A. E. Frissen, J. van Haveren, A. Mayoral, A. van der Bent and D. S. van Es

### Supporting information

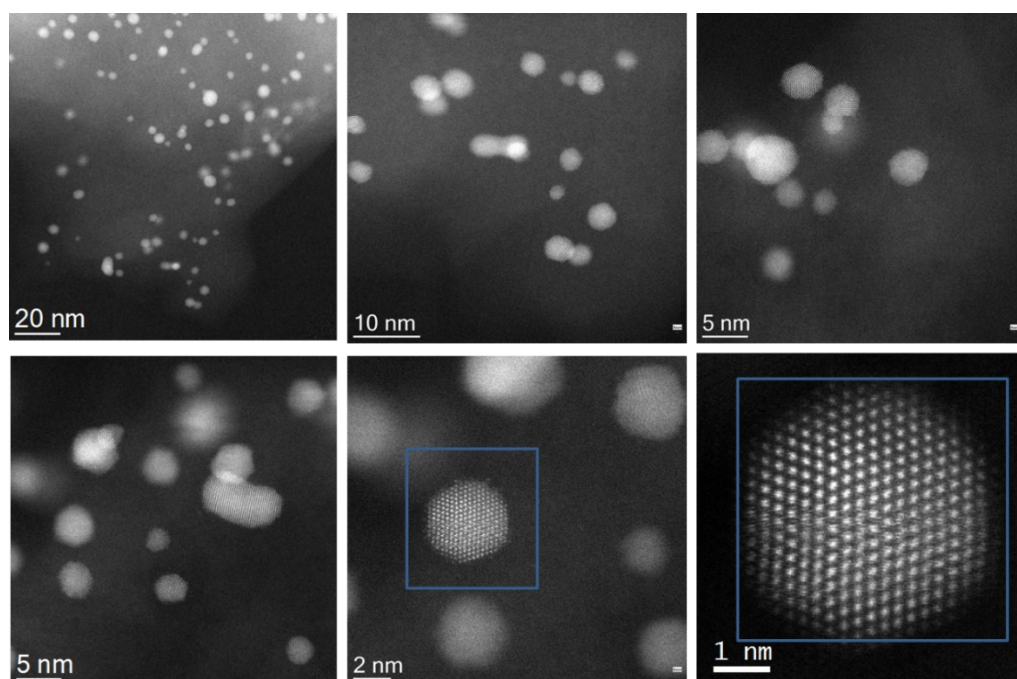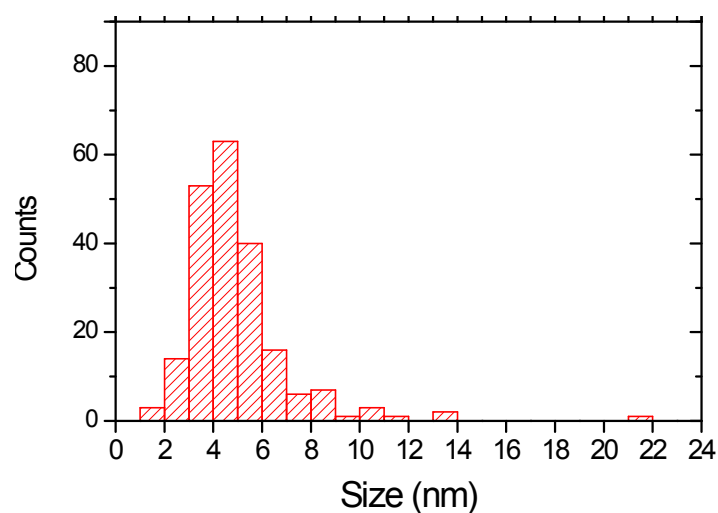

**Figure S1.** HR-STEM-HAADF image of fresh Au/C catalyst at different magnifications and Au particle size distribution

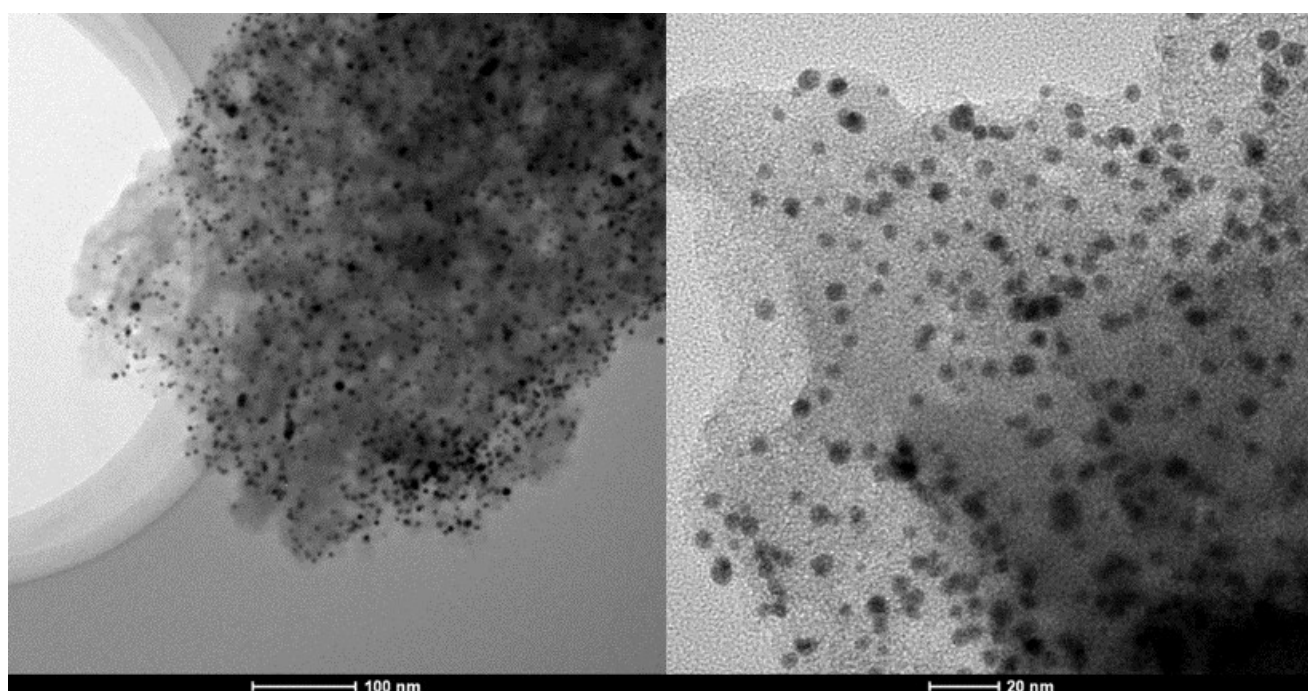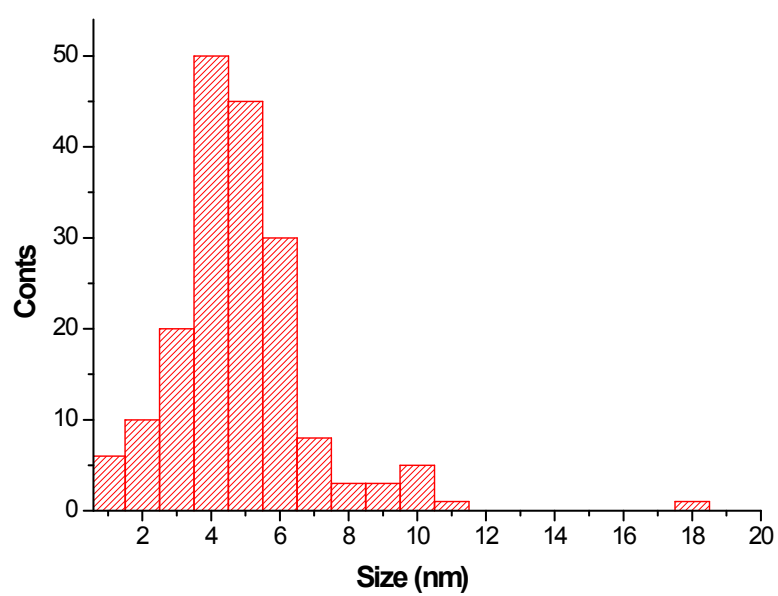

**Figure S2.** BF-TEM images of spent Au/C catalyst after first run in two different magnifications and Au particle size distribution

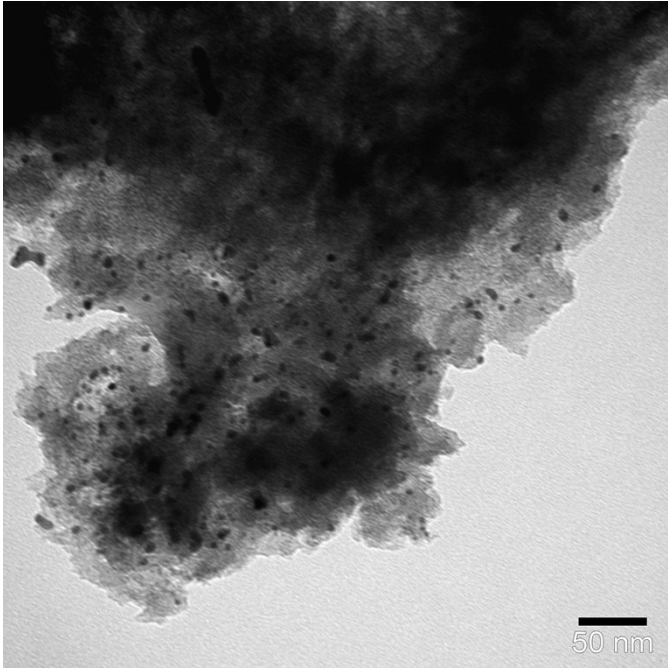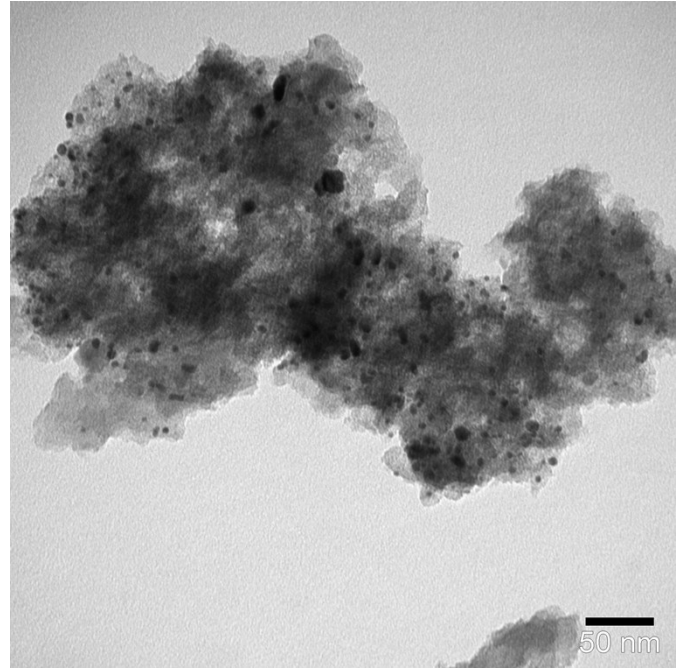

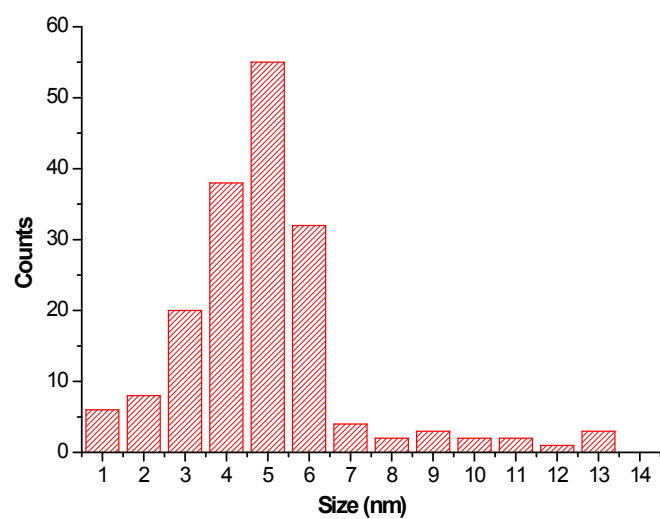

**Figure S3.** BF-TEM images of spent Au/C catalyst after second run and Au particle size distribution

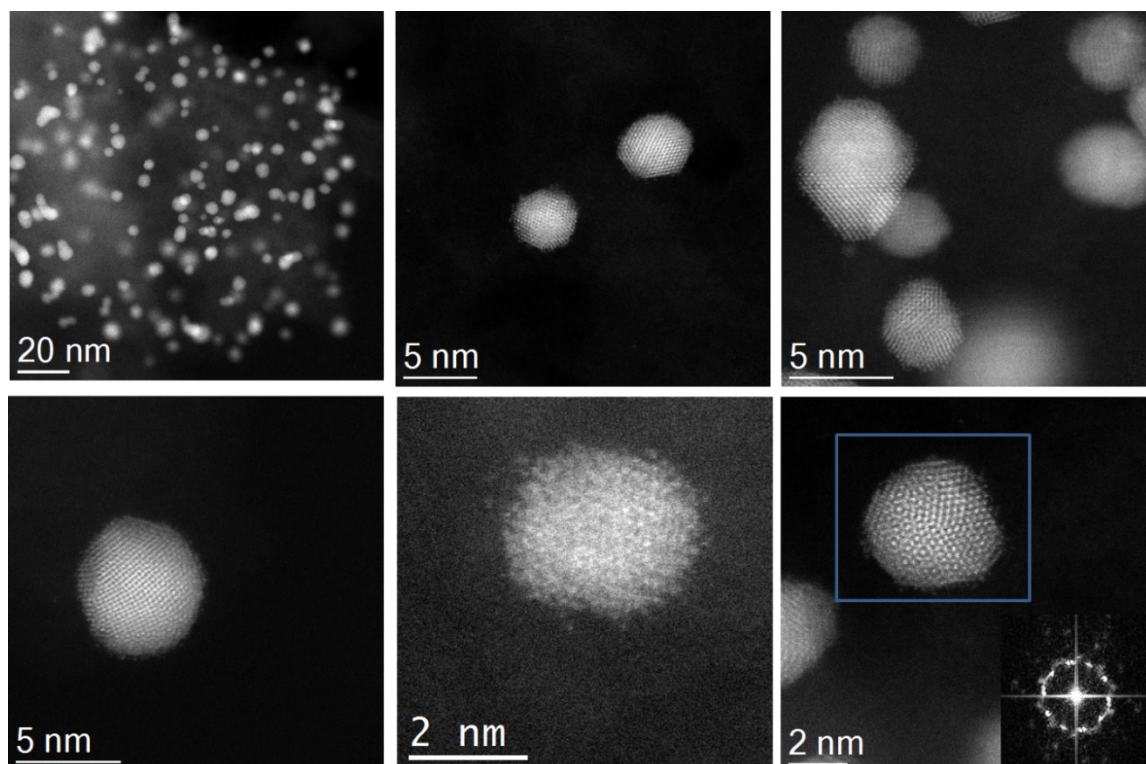

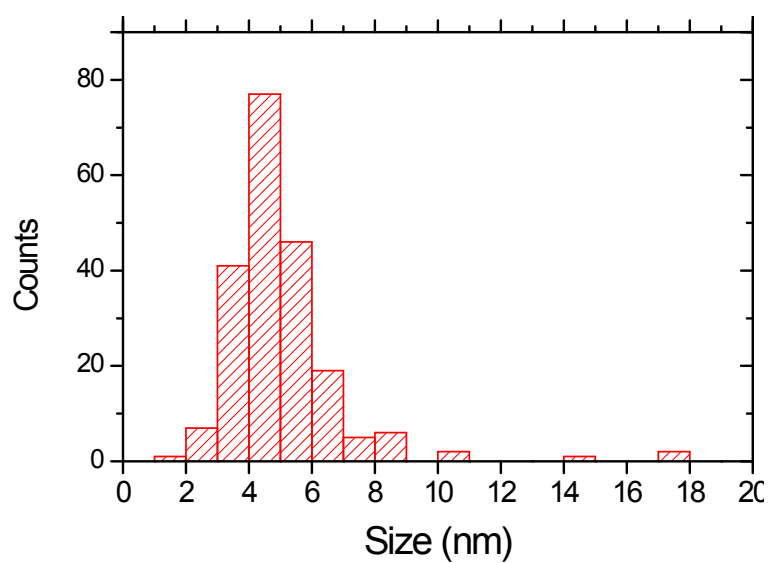

**Figure S4.** HR-STEM-HAADF image of spent Au/C catalyst after third run at different magnifications and Au particle size distribution

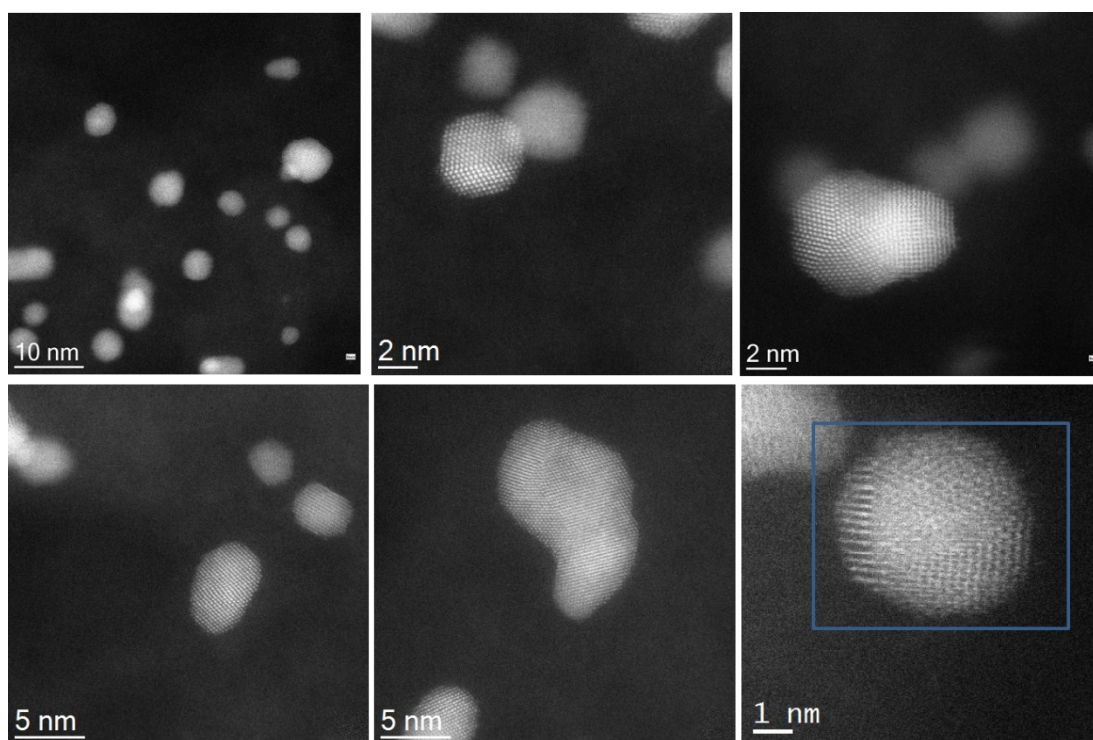

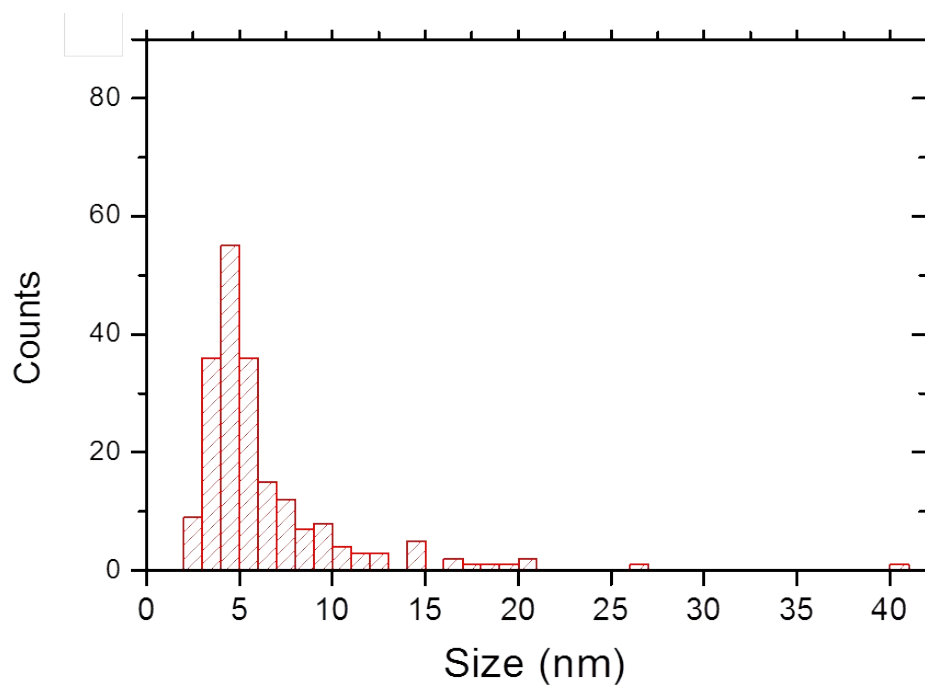

**Figure S5.** HR-STEM-HAADF image of spent Au/C catalyst after fourth run at different magnifications and Au particle size distribution



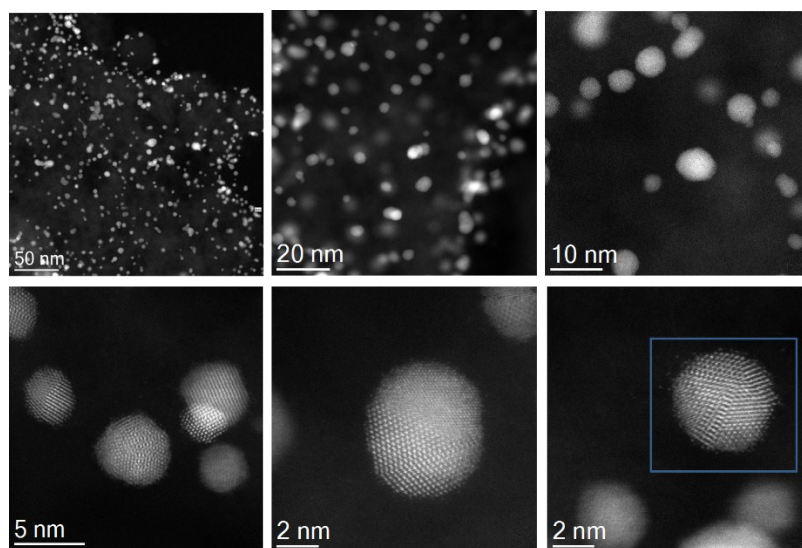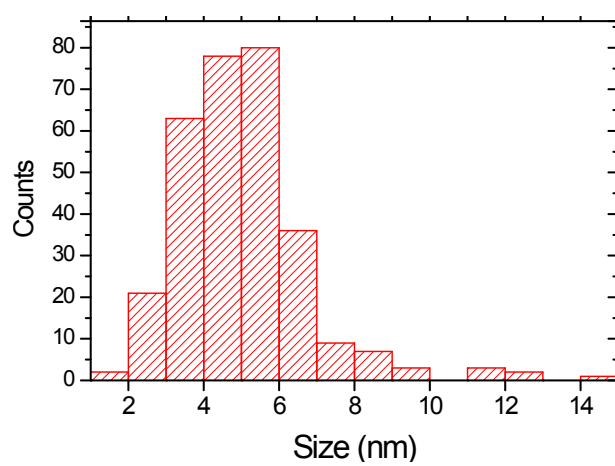

**Figure S6.** HR-STEM-HAADF image of spent Au/C catalyst after fifth run at different magnifications and Au particle size distribution

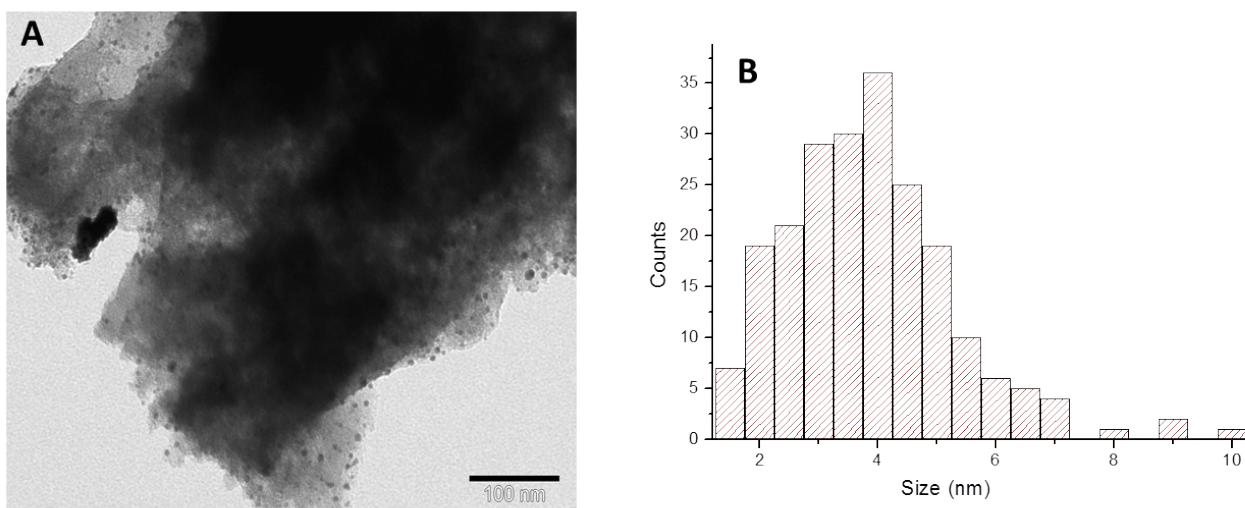

**Figure S7.** (A) BF-TEM image of Pd/C (B) Pd particle size distribution

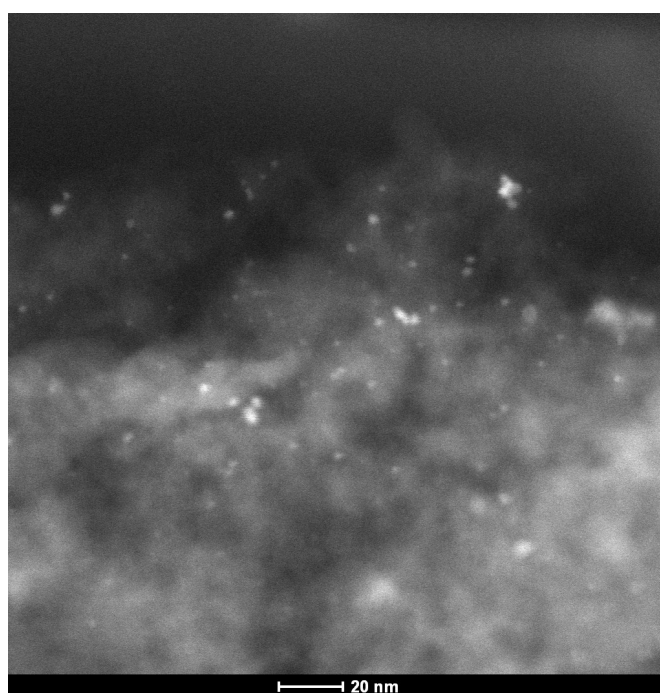

**Figure S8:** STEM-HAADF image of fresh Pt/C catalyst



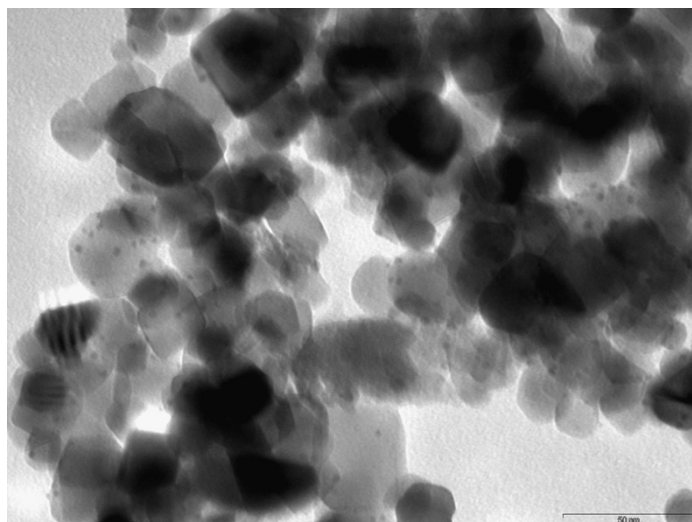

**Figure S9:** BF-TEM image of fresh Au/TiO<sub>2</sub> commercial catalyst

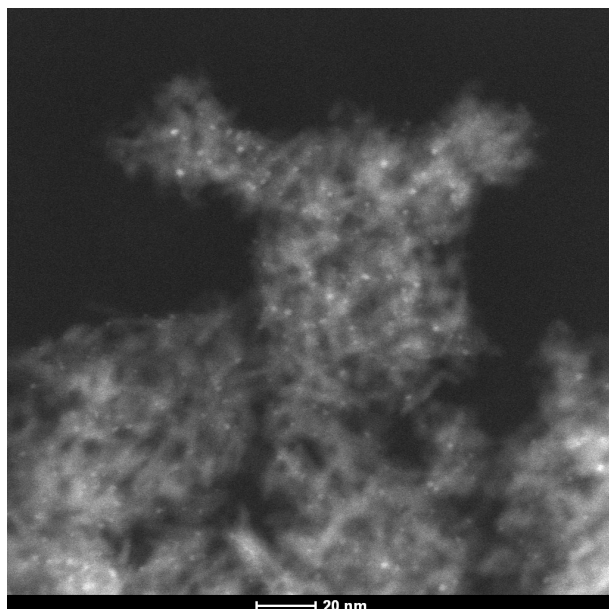

**Figure S10:** (A) STEM-HAADF image of fresh Au/Al<sub>2</sub>O<sub>3</sub> commercial catalyst

**Table S1.** Base-free oxidation of galacturonic acid over commercial Ru and Rh catalysts <sup>a</sup>

| Entry | Catalyst                                 | Conv. (%) <sup>(b)</sup> | Selectivity (%) <sup>(b)</sup> |
|-------|------------------------------------------|--------------------------|--------------------------------|
| 1     | 5wt% Rh/C                                | 0                        | -                              |
| 2     | 5wt% Ru/C                                | 0                        | -                              |
| 3     | 0.5wt% Ru/Al <sub>2</sub> O <sub>3</sub> | 2                        | 98                             |

<sup>a</sup> **Reaction conditions** : 2 mmol of galacturonic acid in 20 mL of deionised water, p(O<sub>2</sub>) = 3 bar, stirring speed = 800 rpm, t = 21 h, T = 333 K, galacturonic acid/(bulk)metal = 448 mol/mol, initial pH= 2.2; <sup>b</sup> = determined by HPLC.

**Table S2.** Reactivity of galacturonic acid in the presence and absence of Au/C catalyst – effect of temperature<sup>a</sup>

Comment [EDv]: Check fonts!

| Entry | Substrate | Temp.<br>(K) | Catalyst | Conv. <sup>(b)</sup><br>(%) | Selectivity (%) <sup>(b)</sup> |     |     |      |      |      |      |      |      | C mass<br>balance<br>(%) |
|-------|-----------|--------------|----------|-----------------------------|--------------------------------|-----|-----|------|------|------|------|------|------|--------------------------|
|       |           |              |          |                             | GalA                           | GA  | GlA | GlyA | TarT | GlyC | OxaL | AceT | ForM |                          |
| 1     | GalA      | 333          | None     | 0                           | 100                            | -   | -   | -    | -    | -    | -    | -    | -    | 100                      |
| 2     | GalA      | 333          | Au/C     | 76                          | 24                             | 76  | 0   | 0    | 0    | 0    | 0    | 0    | 0    | 100                      |
| 3     | GalA      | 353          | None     | <2.0                        | -                              | b.q | b.q | b.q  | b.q  | b.q  | b.q  | b.q  | b.q  | ≥98                      |
| 4     | GalA      | 353          | Au/C     | 100                         | -                              | 95  | -   | -    | b.q. | b.q. | -    | -    | b.q. | 95                       |
| 5     | GalA      | 373          | None     | 85                          | 15                             | 10  | 1   | <1   | 2.5  | 2.5  | 4    | 1    | 1    | 37 <sup>(c)</sup>        |
| 6     | GalA      | 373          | Au/C     | 100                         | -                              | 49  | -   | -    | -    | -    | -    | -    | -    | 49 <sup>(d)</sup>        |

<sup>a</sup>**Reaction conditions:** 2 mmol of substrate in 20mL of deionized water, 126mg of catalyst,  $p(O_2) = 3\text{bar}$ , GalA = galacturonic acid, GalacT = galactaric acid, GlA = glyceraldehyde, GlyA = glyceric acid, TarT = tartronic acid, GlyC = glycolic acid, OxaL = oxalic acid, AceT = acetic acid, ForM = formic acid; <sup>b</sup> = determined by HPLC; <sup>c</sup> No visible solid particles, dark brown transparent solution; <sup>d</sup> Colourless solution, pH 3.7 after 21h, 0.8 bar oxygen pressure drop; b.q = below quantification limit.

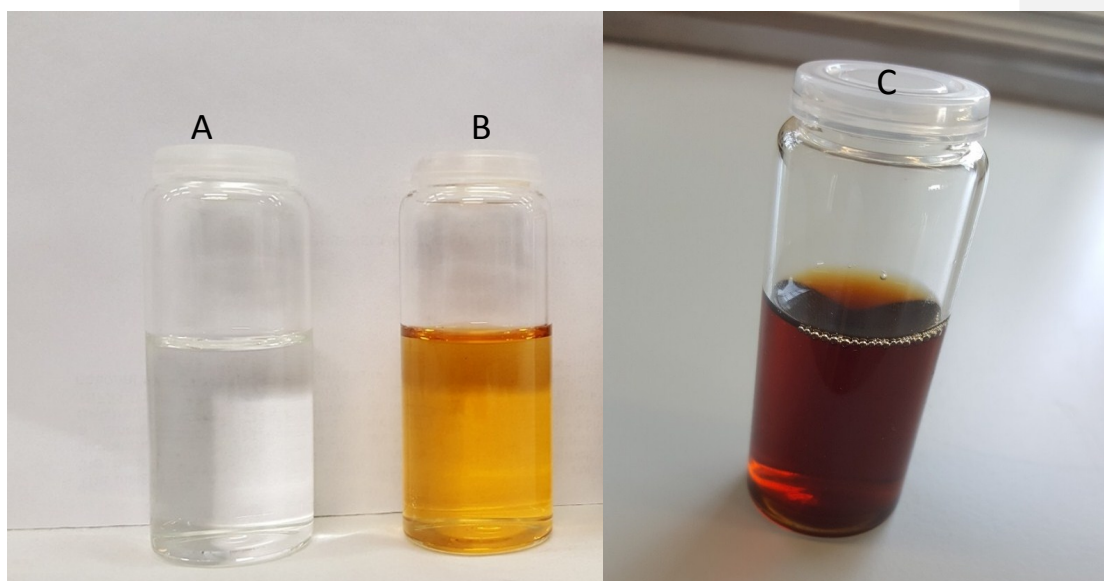

**A = Aq.GalA at 333K for 21h + oxygen**  
**B = Aq.GalA at 353K for 21h + oxygen**  
**C = Aq.GalA at 373K for 21h + oxygen**

**Figure S11:** Galacturonic acid in water at different temperature for 21h in oxygen atmosphere in the absence of catalyst illustrating browning

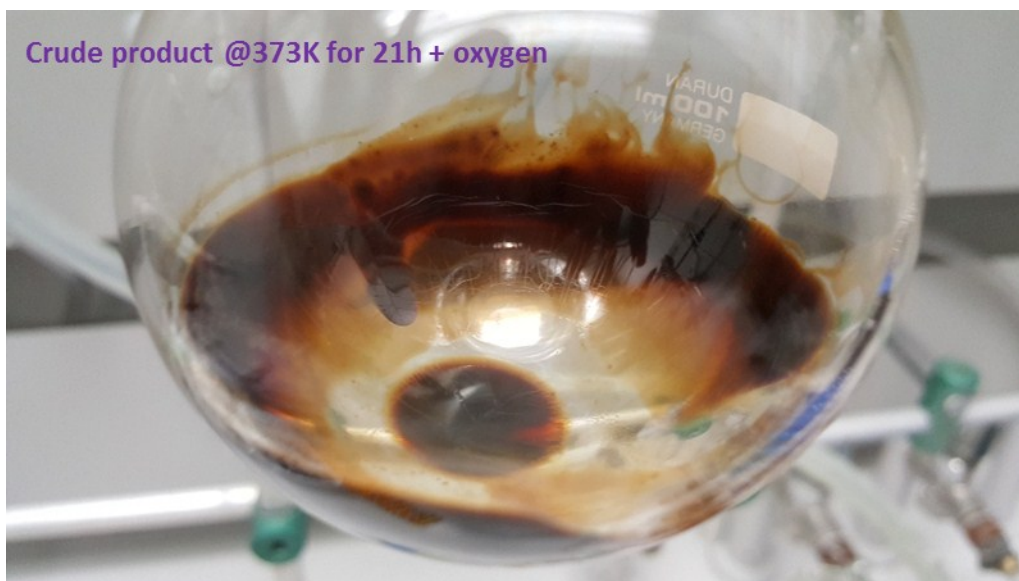

**Figure S12:** Crude product obtained from the reaction of galacturonic acid at 373K in oxygen atmosphere in the absence of catalyst

**GPC analysis:** GPC analyses were performed on a Waters Alliance system (Waters® e2695 Separations Module) equipped with a pre-column (TOSOH Bioscience; TSK gel® PW<sub>XL</sub> Guard 12µm; 6.0×40mm), a column (TOSOH Bioscience; TSK gel® GMPW<sub>XL</sub> Guard 13µm; 7.8×300mm) and a UV detector (Waters 2487, dual λ absorbance) operating at 280 nm. The measurements were performed at 40°C using 0.15M NaOH (Emsure® analytical reagent) as the eluent at a flow rate of 1mL/min. Poly(styrene sulphonate) sodium salts were used for the calibration (obtained from Polymer Standard Services, GmbH). Before analyses, the samples at a concentration of 2mg/mL were dissolved in 0.15M NaOH solution at room temperature by gently shaking for 12h.

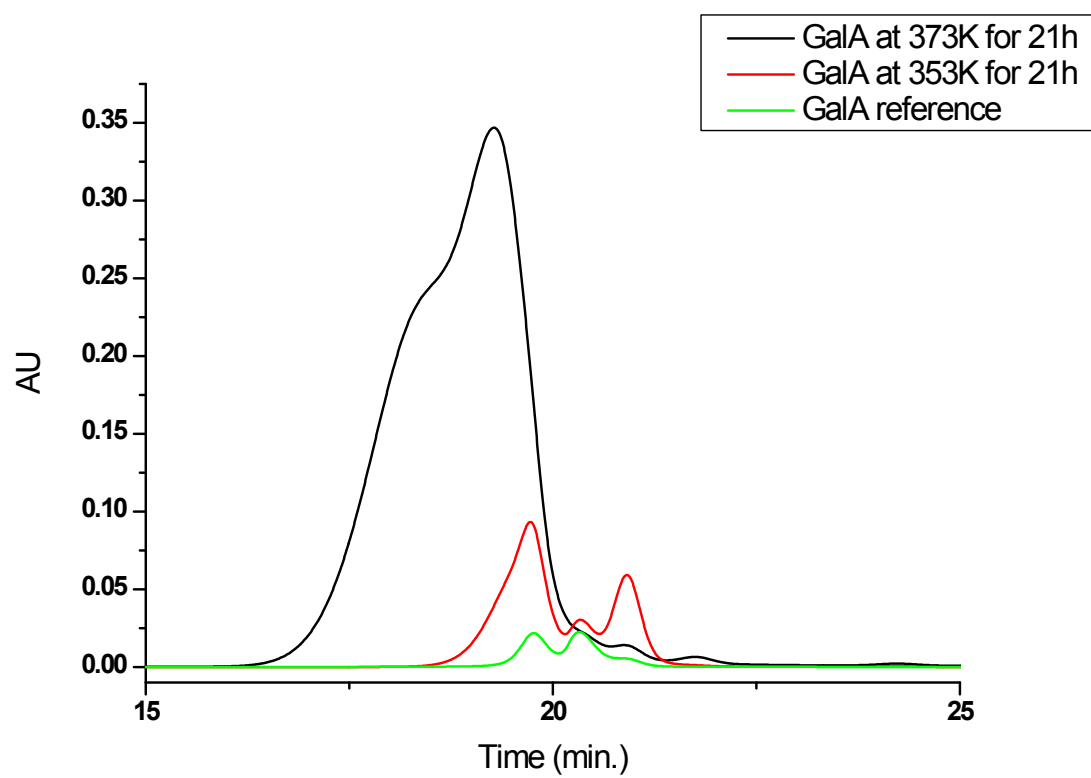

**Figure S13:** GPC Chromatogram of galacturonic acid treated at different temperature in oxygen atmosphere for 21h in the absence of catalyst
